# Supplementary material for: The role of acoustic signals for species recognition in redfronted lemurs (Eulemur rufifrons)
Source: PubMed Central journal article supplement (PMC4866039; doi:10.1186/s12862-016-0677-1), 2016-05-12
Supplement: 12862_2016_677_MOESM6_ESM.pdf [file 12862_2016_677_MOESM6_ESM.pdf]

### **Additional files**

**Additional file 6:** Average looking duration towards the speaker after each playback stimulus in the populations at Kirindy Forest and Ranomafana National Park.

| <b>Species used as playback stimuli</b> | <b>Location</b> | <b>Looking duration towards the speaker (average)</b> |
|-----------------------------------------|-----------------|-------------------------------------------------------|
| <i>Eulemur albifrons</i>                | Kirindy         | 15.80 ( $\pm 14.36$ )                                 |
|                                         | Ranomafana      | 9.61 ( $\pm 11.00$ )                                  |
| <i>Eulemur rubriventer</i>              | Kirindy         | 4.56 ( $\pm 6.93$ )                                   |
|                                         | Ranomafana      | 13.89 ( $\pm 15.49$ )                                 |
| <i>Eulemur rufifrons</i>                | Kirindy         | 14.95 ( $\pm 12.79$ )                                 |
|                                         | Ranomafana      | 16.73 ( $\pm 15.53$ )                                 |
